# Supplementary material for: Enthalpic interactions in aqueous strong electrolytes upon addition of ionic liquids
Source: Royal Society of Chemistry journal article supplement (doi:10.1039/c7cp07814e), 2018-01-01

**Electronic Supplementary Information (ESI)**

**Enthalpic Interactions in Aqueous Strong Electrolytes upon Addition of Ionic  
Liquids**

**Preeti Jain and Anil Kumar\***

Physical & Materials Chemistry Division,  
CSIR-National Chemical Laboratory,  
Pune-411008, India

**Table S1.** The Experimental  $H_{IL}^E$  values and the calculated relative apparent molar enthalpy,  $\phi_L$  values for aqueous solution of NaCl.

| $m \times 10^6 / \text{mol kg}^{-1}$ | $H_{IL}^E / \text{kJ mol}^{-1}$ | $\phi_L / \text{kJ mol}^{-1}$ |
|--------------------------------------|---------------------------------|-------------------------------|
| 0                                    | -                               | -                             |
| 1.100                                | -80.04                          | -80.29                        |
| 2.185                                | -38.19                          | -150.9                        |
| 3.254                                | -23.60                          | -215.0                        |
| 4.309                                | -16.65                          | -273.9                        |
| 5.350                                | -12.99                          | -328.4                        |
| 6.376                                | -10.41                          | -379.0                        |
| 7.388                                | -8.292                          | -426.1                        |
| 8.387                                | -6.973                          | -470.0                        |
| 9.372                                | -6.074                          | -511.0                        |
| 10.34                                | -5.215                          | -549.4                        |
| 11.30                                | -4.736                          | -585.2                        |
| 12.25                                | -4.268                          | -618.7                        |
| 13.19                                | -4.033                          | -650.1                        |
| 14.11                                | -3.739                          | -679.4                        |

**Table S2.** The Experimental  $H_{IL}^E$  values and the calculated relative apparent molar enthalpy,  $\phi_L$  values for aqueous solution of [MIM]Cl.

| $m \times 10^6 / \text{mol kg}^{-1}$ | $H_{IL}^E / \text{kJ mol}^{-1}$ | $\phi_L / \text{kJ mol}^{-1}$ |
|--------------------------------------|---------------------------------|-------------------------------|
| 0                                    | -                               | -                             |
| 1.156                                | -24.09                          | -3.247                        |
| 2.295                                | -18.31                          | -6.449                        |
| 3.419                                | -14.26                          | -9.606                        |
| 4.527                                | -10.85                          | -12.72                        |
| 5.620                                | -8.649                          | -15.79                        |
| 6.698                                | -7.335                          | -18.82                        |
| 7.761                                | -5.916                          | -21.81                        |
| 8.810                                | -5.140                          | -24.76                        |
| 9.845                                | -4.636                          | -27.67                        |
| 10.87                                | -4.092                          | -30.54                        |
| 11.87                                | -3.604                          | -33.37                        |
| 12.87                                | -3.337                          | -36.16                        |
| 13.85                                | -3.068                          | -38.92                        |
| 14.82                                | -2.869                          | -41.65                        |

**Table S3.** The Experimental  $H_{IL}^E$  values and the calculated relative apparent molar enthalpy,  $\phi_L$  values for mixing of aqueous solution of [MIM]Cl-NaCl.

| $m \times 10^6 / \text{mol kg}^{-1}$ | $H_{IL}^E / \text{kJ mol}^{-1}$ | $\phi_L / \text{kJ mol}^{-1}$ |
|--------------------------------------|---------------------------------|-------------------------------|
| 0                                    | -                               | -                             |
| 1.118                                | 71.79                           | 91.31                         |
| 2.220                                | 26.40                           | 171.3                         |
| 3.306                                | 15.37                           | 243.7                         |
| 4.377                                | 10.18                           | 310.0                         |
| 5.434                                | 6.828                           | 371.2                         |
| 6.475                                | 5.097                           | 427.9                         |
| 7.503                                | 4.175                           | 480.5                         |
| 8.517                                | 3.340                           | 529.4                         |
| 9.517                                | 2.698                           | 574.9                         |
| 10.50                                | 2.320                           | 617.3                         |
| 11.48                                | 1.940                           | 656.8                         |
| 12.44                                | 1.715                           | 693.6                         |
| 13.39                                | 1.454                           | 727.9                         |
| 14.32                                | 1.210                           | 759.9                         |

**Table S4.** The Experimental  $H_{\text{IL}}^{\text{E}}$  values and the calculated relative apparent molar enthalpy,  $\phi_{\text{L}}$  values for aqueous solution of [Py]Cl.

| $m \times 10^6 / \text{mol kg}^{-1}$ | $H_{\text{IL}}^{\text{E}} / \text{kJ mol}^{-1}$ | $\phi_{\text{L}} / \text{kJ mol}^{-1}$ |
|--------------------------------------|-------------------------------------------------|----------------------------------------|
| 0                                    | -                                               | -                                      |
| 2.136                                | 60.24                                           | 207.0                                  |
| 3.182                                | 29.98                                           | 295.6                                  |
| 4.214                                | 18.05                                           | 377.3                                  |
| 5.231                                | 12.00                                           | 453.2                                  |
| 6.234                                | 8.743                                           | 523.9                                  |
| 7.224                                | 6.265                                           | 590.0                                  |
| 8.201                                | 4.837                                           | 651.9                                  |
| 9.164                                | 3.600                                           | 709.9                                  |
| 10.12                                | 2.867                                           | 764.3                                  |
| 11.05                                | 2.288                                           | 815.4                                  |
| 11.98                                | 1.732                                           | 863.5                                  |
| 12.89                                | 1.547                                           | 908.6                                  |
| 13.80                                | 1.085                                           | 951.1                                  |

**Table S5.** The Experimental  $H_{\text{IL}}^{\text{E}}$  values and the calculated relative apparent molar enthalpy,  $\phi_{\text{L}}$  values for mixing of aqueous solution of [Py]Cl-NaCl.

| $m \times 10^6 / \text{mol kg}^{-1}$ | $H_{\text{IL}}^{\text{E}} / \text{kJ mol}^{-1}$ | $\phi_{\text{L}} / \text{kJ mol}^{-1}$ |
|--------------------------------------|-------------------------------------------------|----------------------------------------|
| 0                                    | -                                               | -                                      |
| 1.118                                | 256.3                                           | 335.2                                  |
| 2.219                                | 93.45                                           | 628.5                                  |
| 3.305                                | 49.87                                           | 894.0                                  |
| 4.376                                | 31.21                                           | 1137                                   |
| 5.433                                | 21.46                                           | 1361                                   |
| 6.474                                | 15.48                                           | 1569                                   |
| 7.502                                | 11.87                                           | 1761                                   |
| 8.515                                | 9.288                                           | 1940                                   |
| 9.515                                | 7.501                                           | 2106                                   |
| 10.50                                | 6.139                                           | 2261                                   |
| 11.47                                | 5.203                                           | 2405                                   |
| 12.43                                | 4.276                                           | 2539                                   |
| 13.38                                | 3.707                                           | 2664                                   |
| 14.32                                | 3.025                                           | 2780                                   |

**Table S6.** The Experimental  $H_{\text{IL}}^{\text{E}}$  values and the calculated relative apparent molar enthalpy,  $\phi_{\text{L}}$  values for aqueous solution of [MPyrr]Cl.

| $m \times 10^6 / \text{mol kg}^{-1}$ | $H_{\text{IL}}^{\text{E}} / \text{kJ mol}^{-1}$ | $\phi_{\text{L}} / \text{kJ mol}^{-1}$ |
|--------------------------------------|-------------------------------------------------|----------------------------------------|
| 0                                    | -                                               | -                                      |
| 1.071                                | -74.53                                          | -89.33                                 |
| 2.127                                | -30.49                                          | -167.6                                 |
| 3.168                                | -17.27                                          | -238.5                                 |
| 4.195                                | -11.36                                          | -303.6                                 |
| 5.207                                | -8.477                                          | -363.6                                 |
| 6.206                                | -6.624                                          | -419.2                                 |
| 7.192                                | -5.321                                          | -470.8                                 |
| 8.164                                | -4.233                                          | -518.9                                 |
| 9.123                                | -3.529                                          | -563.6                                 |
| 10.07                                | -2.888                                          | -605.3                                 |
| 11.00                                | -2.555                                          | -644.2                                 |
| 11.93                                | -2.308                                          | -680.5                                 |
| 12.84                                | -1.919                                          | -714.3                                 |
| 13.73                                | -1.833                                          | -745.8                                 |

**Table S7.** The Experimental  $H_{\text{IL}}^{\text{E}}$  values and the calculated relative apparent molar enthalpy,  $\phi_{\text{L}}$  values for mixing of aqueous solution of [MPyrr]Cl-NaCl.

| $m \times 10^6 / \text{mol kg}^{-1}$ | $H_{\text{IL}}^{\text{E}} / \text{kJ mol}^{-1}$ | $\phi_{\text{L}} / \text{kJ mol}^{-1}$ |
|--------------------------------------|-------------------------------------------------|----------------------------------------|
| 0                                    | -                                               | -                                      |
| 1.104                                | -36.73                                          | -54.80                                 |
| 2.192                                | -11.06                                          | -102.7                                 |
| 3.266                                | -4.802                                          | -146.0                                 |
| 4.324                                | -2.495                                          | -185.6                                 |
| 5.367                                | -1.531                                          | -222.0                                 |
| 6.396                                | -1.026                                          | -255.8                                 |
| 7.411                                | -0.5277                                         | -287.0                                 |
| 8.413                                | -0.3183                                         | -316.0                                 |
| 9.400                                | -0.3840                                         | -343.0                                 |
| 10.37                                | -0.3971                                         | -368.0                                 |
| 11.33634                             | -0.0474                                         | -391.3                                 |
| 12.29                                | -0.1354                                         | -412.9                                 |
| 13.22                                | -0.0586                                         | -433.1                                 |
| 14.15                                | -0.3409                                         | -451.8                                 |



**Table S8.** The Experimental  $H_{\text{IL}}^{\text{E}}$  values and the calculated relative apparent molar enthalpy,  $\phi_{\text{L}}$  values for aqueous solution of  $\text{NaBF}_4$ .

| $m \times 10^6 / \text{mol kg}^{-1}$ | $H_{\text{IL}}^{\text{E}} / \text{kJ mol}^{-1}$ | $\phi_{\text{L}} / \text{kJ mol}^{-1}$ |
|--------------------------------------|-------------------------------------------------|----------------------------------------|
| 0                                    | -                                               | -                                      |
| 1.075                                | 463.4                                           | 291.3                                  |
| 2.149                                | 280.7                                           | 552.5                                  |
| 3.224                                | 211.0                                           | 794.0                                  |
| 4.298                                | 172.3                                           | 1020                                   |
| 5.373                                | 147.7                                           | 1231                                   |
| 6.448                                | 128.5                                           | 1431                                   |
| 7.522                                | 115.0                                           | 1620                                   |
| 8.600                                | 105.0                                           | 1798                                   |
| 9.671                                | 95.47                                           | 1966                                   |
| 10.75                                | 87.82                                           | 2126                                   |
| 10.96                                | 81.45                                           | 2276                                   |
| 11.88                                | 75.61                                           | 2419                                   |
| 12.79                                | 70.38                                           | 2553                                   |
| 13.68                                | 65.89                                           | 2680                                   |

**Table S9.** The Experimental  $H_{IL}^E$  values and the calculated relative apparent molar enthalpy,  $\phi_L$  values for aqueous solution of [MIM][BF<sub>4</sub>].

| $m \times 10^6 / \text{mol kg}^{-1}$ | $H_{IL}^E / \text{kJ mol}^{-1}$ | $\phi_L / \text{kJ mol}^{-1}$ |
|--------------------------------------|---------------------------------|-------------------------------|
| 0                                    | -                               | -                             |
| 1.071                                | -130.2                          | -156.5                        |
| 2.127                                | -51.86                          | -293.6                        |
| 3.169                                | -27.25                          | -417.7                        |
| 4.196                                | -16.83                          | -531.5                        |
| 5.209                                | -11.2110                        | -636.5                        |
| 6.209                                | -7.033                          | -733.6                        |
| 7.195                                | -4.508                          | -823.8                        |
| 8.167                                | -1.985                          | -907.6                        |
| 9.127                                | -0.7171                         | -985.7                        |
| 10.07                                | 0.7761                          | -1058                         |
| 11.01                                | 2.262                           | -1126                         |
| 11.93                                | 3.694                           | -1189                         |
| 12.84                                | 3.984                           | -1248                         |
| 13.74                                | 3.968                           | -1303                         |

**Table S10.** The Experimental  $H_{IL}^E$  values and the calculated relative apparent molar enthalpy,  $\phi_L$  values for mixing of aqueous solution of [MIM][BF<sub>4</sub>]-NaBF<sub>4</sub>.

| $m \times 10^6 / \text{mol kg}^{-1}$ | $H_{IL}^E / \text{kJ mol}^{-1}$ | $\phi_L / \text{kJ mol}^{-1}$ |
|--------------------------------------|---------------------------------|-------------------------------|
| 0                                    | -                               | -                             |
| 1.160                                | 31.82                           | 29.44                         |
| 2.303                                | 15.98                           | 55.33                         |
| 3.430                                | 10.34                           | 78.88                         |
| 4.541                                | 7.450                           | 100.5                         |
| 5.637                                | 5.270                           | 120.6                         |
| 6.717                                | 4.375                           | 139.2                         |
| 7.783                                | 3.656                           | 156.5                         |
| 8.834                                | 2.787                           | 172.7                         |
| 9.870                                | 2.554                           | 187.8                         |
| 10.89                                | 2.085                           | 201.9                         |
| 11.90                                | 1.955                           | 215.1                         |
| 12.90                                | 1.394                           | 227.5                         |
| 13.88                                | 1.375                           | 239.1                         |
| 14.85                                | 1.145                           | 249.9                         |

**Table S11.** The Experimental  $H_{\text{IL}}^{\text{E}}$  values and the calculated relative apparent molar enthalpy,  $\phi_{\text{L}}$  values for aqueous solution of [EMIM][BF<sub>4</sub>].

| $m \times 10^6 / \text{mol kg}^{-1}$ | $H_{\text{IL}}^{\text{E}} / \text{kJ mol}^{-1}$ | $\phi_{\text{L}} / \text{kJ mol}^{-1}$ |
|--------------------------------------|-------------------------------------------------|----------------------------------------|
| 0                                    | -                                               | -                                      |
| 1.074                                | 11.60                                           | 5.816                                  |
| 2.133                                | 7.159                                           | 10.97                                  |
| 3.177                                | 6.110                                           | 15.68                                  |
| 4.207                                | 5.093                                           | 20.04                                  |
| 5.223                                | 3.933                                           | 24.09                                  |
| 6.225                                | 3.475                                           | 27.88                                  |
| 7.214                                | 3.183                                           | 31.42                                  |
| 8.189                                | 2.672                                           | 34.74                                  |
| 9.151                                | 2.381                                           | 37.87                                  |
| 10.10                                | 2.289                                           | 40.80                                  |
| 11.04                                | 2.141                                           | 43.57                                  |
| 11.96                                | 1.858                                           | 46.17                                  |
| 12.87                                | 1.798                                           | 48.62                                  |
| 13.78                                | 1.537                                           | 50.93                                  |

**Table S12.** The Experimental  $H_{IL}^E$  values and the calculated relative apparent molar enthalpy,  $\phi_L$  values for mixing of aqueous solution of [EMIM][BF<sub>4</sub>]-NaBF<sub>4</sub>.

| $m \times 10^6 / \text{mol kg}^{-1}$ | $H_{IL}^E / \text{kJ mol}^{-1}$ | $\phi_L / \text{kJ mol}^{-1}$ |
|--------------------------------------|---------------------------------|-------------------------------|
| 0                                    | -                               | -                             |
| 1.120                                | 341.1                           | 323.4                         |
| 2.224                                | 170.6                           | 607.4                         |
| 3.312                                | 113.2                           | 865.4                         |
| 4.385                                | 83.67                           | 1102                          |
| 5.442                                | 67.18                           | 1321                          |
| 6.485                                | 55.22                           | 1525                          |
| 7.514                                | 47.10                           | 1714                          |
| 8.529                                | 40.65                           | 1890                          |
| 9.530                                | 36.01                           | 2054                          |
| 10.52                                | 32.34                           | 2208                          |
| 11.49                                | 28.97                           | 2351                          |
| 12.45                                | 26.36                           | 2486                          |
| 13.40                                | 24.00                           | 2611                          |
| 14.34                                | 22.15                           | 2728                          |

**Table S13.** The Experimental  $H_{IL}^E$  values and the calculated relative apparent molar enthalpy,  $\phi_L$  values for aqueous solution of [BMIM][BF<sub>4</sub>].

| $m \times 10^6 / \text{mol kg}^{-1}$ | $H_{IL}^E / \text{kJ mol}^{-1}$ | $\phi_L / \text{kJ mol}^{-1}$ |
|--------------------------------------|---------------------------------|-------------------------------|
| 0                                    | -                               | -                             |
| 1.056                                | -42.99                          | -46.69                        |
| 2.098                                | -19.30                          | -87.66                        |
| 3.125                                | -12.17                          | -124.9                        |
| 4.138                                | -8.290                          | -159.0                        |
| 5.137                                | -6.012                          | -190.5                        |
| 6.122                                | -5.119                          | -219.8                        |
| 7.095                                | -4.254                          | -247.0                        |
| 8.054                                | -3.712                          | -272.3                        |
| 9.000                                | -3.173                          | -295.9                        |
| 9.934                                | -2.823                          | -318.0                        |
| 10.86                                | -2.526                          | -338.6                        |
| 11.76                                | -2.456                          | -357.8                        |
| 12.66                                | -2.110                          | -375.8                        |
| 13.55                                | -1.919                          | -392.5                        |

**Table S14.** The Experimental  $H_{IL}^E$  values and the calculated relative apparent molar enthalpy,  $\phi_L$  values for mixing of aqueous solution of [BMIM][BF<sub>4</sub>]-NaBF<sub>4</sub>.

| $m \times 10^6 / \text{mol kg}^{-1}$ | $H_{IL}^E / \text{kJ mol}^{-1}$ | $\phi_L / \text{kJ mol}^{-1}$ |
|--------------------------------------|---------------------------------|-------------------------------|
| 0                                    | -                               | -                             |
| 1.083                                | 309.8                           | 296.5                         |
| 2.151                                | 152.9                           | 556.9                         |
| 3.203                                | 102.1                           | 793.4                         |
| 4.241                                | 75.14                           | 1011                          |
| 5.264                                | 60.32                           | 1211                          |
| 6.272                                | 49.59                           | 1398                          |
| 7.267                                | 41.92                           | 1571                          |
| 8.249                                | 36.24                           | 1733                          |
| 9.217                                | 32.09                           | 1883                          |
| 10.17                                | 28.60                           | 2024                          |
| 11.11                                | 25.72                           | 2156                          |
| 12.04                                | 23.28                           | 2279                          |
| 12.96                                | 21.36                           | 2394                          |
| 13.87                                | 19.56                           | 2502                          |

**Table S15.** The Experimental  $H_{\text{IL}}^{\text{E}}$  values and the calculated relative apparent molar enthalpy,  $\phi_{\text{L}}$  values for aqueous solution of [HMIM][BF<sub>4</sub>].

| $m \times 10^6 / \text{mol kg}^{-1}$ | $H_{\text{IL}}^{\text{E}} / \text{kJ mol}^{-1}$ | $\phi_{\text{L}} / \text{kJ mol}^{-1}$ |
|--------------------------------------|-------------------------------------------------|----------------------------------------|
| 0                                    | -                                               | -                                      |
| 1.069                                | -90.70                                          | -93.70                                 |
| 2.124                                | -42.72                                          | -175.9                                 |
| 3.164                                | -26.46                                          | -250.6                                 |
| 4.189                                | -20.06                                          | -319.1                                 |
| 5.201                                | -15.92                                          | -382.4                                 |
| 6.198                                | -12.87                                          | -441.1                                 |
| 7.182                                | -10.72                                          | -495.7                                 |
| 8.153                                | -9.217                                          | -546.6                                 |
| 9.111                                | -8.069                                          | -594.0                                 |
| 10.06                                | -7.286                                          | -638.2                                 |
| 10.99                                | -6.574                                          | -679.6                                 |
| 11.91                                | -5.855                                          | -718.2                                 |
| 12.82                                | -5.383                                          | -754.3                                 |
| 13.72                                | -5.081                                          | -788.0                                 |



**Table S16.** The Experimental  $H_{IL}^E$  values and the calculated relative apparent molar enthalpy,  $\phi_L$  values for mixing of aqueous solution of [HMIM][BF<sub>4</sub>]-NaBF<sub>4</sub>.

| $m \times 10^6 / \text{mol kg}^{-1}$ | $H_{IL}^E / \text{kJ mol}^{-1}$ | $\phi_L / \text{kJ mol}^{-1}$ |
|--------------------------------------|---------------------------------|-------------------------------|
| 0                                    | -                               | -                             |
| 1.078                                | 293.8                           | 280.9                         |
| 2.141                                | 146.4                           | 527.5                         |
| 3.188                                | 96.30                           | 751.6                         |
| 4.221                                | 71.95                           | 957.3                         |
| 5.240                                | 57.46                           | 1148                          |
| 6.244                                | 47.54                           | 1324                          |
| 7.235                                | 40.16                           | 1488                          |
| 8.212                                | 34.83                           | 1641                          |
| 9.175                                | 30.80                           | 1784                          |
| 10.13                                | 27.52                           | 1917                          |
| 11.06                                | 24.81                           | 2042                          |
| 12.00                                | 22.31                           | 2159                          |
| 12.90                                | 20.63                           | 2268                          |
| 13.80                                | 18.84                           | 2369                          |

**Table S17.** The Adjustable parameters for fitting excess partial molar enthalpy data ( $H^E_{II}/\text{kJ mol}^{-1}$ ) of different aqueous solution of ionic liquid-salt systems using equation 2.

| system                                      | $10^{-4}a_0$ (kJ mol <sup>-1.5</sup> kg <sup>0.5</sup> ) | $10^{-7}a_1$ (kJ mol <sup>-2</sup> kg) | $10^{-9}a_2$ (kJ mol <sup>-2.5</sup> kg <sup>1.5</sup> ) |
|---------------------------------------------|----------------------------------------------------------|----------------------------------------|----------------------------------------------------------|
| NaCl                                        | 24.9±1.81                                                | -8.3±0.79                              | 9.2±1.1                                                  |
| [MIM]Cl                                     | 2.1±0.05                                                 | -0.28±0.01                             | -                                                        |
| [MIM]Cl- NaCl                               | -27.0±2.6                                                | 9.3±1.1                                | -10.5±1.5                                                |
| [Py]Cl                                      | -35.4±3.0                                                | 11.5±1.2                               | -12.4±1.5                                                |
| [Py]Cl- NaCl                                | -99±8.8                                                  | 34.1±3.8                               | -38.8±5.2                                                |
| [MPyrr]Cl                                   | 27.3±2.3                                                 | -9.5±1.0                               | 10.9±1.4                                                 |
| [MPyrr]Cl- NaCl                             | 16.0±1.6                                                 | -5.7±0.67                              | 6.5±0.90                                                 |
| NaBF <sub>4</sub>                           | -98±6.7                                                  | 30.5±2.9                               | 32.7±3.8                                                 |
| [MIM][BF <sub>4</sub> ]                     | 48.2±4.0                                                 | -16.6±1.8                              | 19.2±2.5                                                 |
| [MIM][BF <sub>4</sub> ]- NaBF <sub>4</sub>  | -9.1±0.58                                                | 2.9±0.25                               | -3.1±0.33                                                |
| [EMIM][BF <sub>4</sub> ]                    | -2.1±0.27                                                | 0.61±0.12                              | -0.64±0.16                                               |
| [EMIM][BF <sub>4</sub> ]- NaBF <sub>4</sub> | -100±7.2                                                 | 32.7±3.1                               | -36.1±4.2                                                |
| [BMIM][BF <sub>4</sub> ]                    | 14.6±1.1                                                 | -5.0±0.48                              | 5.7±0.67                                                 |
| [BMIM][BF <sub>4</sub> ]- NaBF <sub>4</sub> | -93±7.0                                                  | 31.0±3.1                               | -34.9±4.3                                                |
| [HMIM][BF <sub>4</sub> ]                    | 29.2±2.3                                                 | -9.9±1.0                               | 11.3±1.4                                                 |
| [HMIM][BF <sub>4</sub> ]- NaBF <sub>4</sub> | -88.1±6.5                                                | 29.5±2.9                               | -33.2±3.9                                                |

**Table S18.** The adjustable parameters for fitting relative apparent molar enthalpy data ( $\phi_L/\text{kJ mol}^{-1}$ ) of different aqueous solution of ionic liquid-salt systems using equation 6 with correlation coefficient  $r^2 > 0.99$ .

| system            | $10^{-7}q$         | system                                      | $10^{-7}q$         |
|-------------------|--------------------|---------------------------------------------|--------------------|
| NaCl              | $-5.421 \pm 0.121$ | [MIM][BF <sub>4</sub> ]                     | $-10.55 \pm 0.242$ |
| [MIM]Cl           | $-0.452 \pm 0.009$ | [MIM][BF <sub>4</sub> ]- NaBF <sub>4</sub>  | $1.659 \pm 0.030$  |
| [MIM]Cl- NaCl     | $5.627 \pm 0.126$  | [EMIM][BF <sub>4</sub> ]                    | $22.11 \pm 0.003$  |
| [Py]Cl            | $7.288 \pm 0.151$  | [EMIM][BF <sub>4</sub> ]- NaBF <sub>4</sub> | $20.56 \pm 0.439$  |
| [Py]Cl- NaCl      | $21.07 \pm 0.490$  | [BMIM][BF <sub>4</sub> ]                    | $-3.340 \pm 0.783$ |
| [MPyrr]Cl         | $-6.113 \pm 0.141$ | [BMIM][BF <sub>4</sub> ]- NaBF <sub>4</sub> | $19.48 \pm 0.415$  |
| [MPyrr]Cl- NaCl   | $-3.676 \pm 0.089$ | [HMIM][BF <sub>4</sub> ]                    | $-6.446 \pm 0.146$ |
| NaBF <sub>4</sub> | $19.27 \pm 0.416$  | [HMIM][BF <sub>4</sub> ]- NaBF <sub>4</sub> | $18.53 \pm 0.395$  |

# <sup>1</sup>H NMR of Ionic Liquids

## 1. [MPyrr]Cl - <sup>1</sup>H NMR, 200 MHz

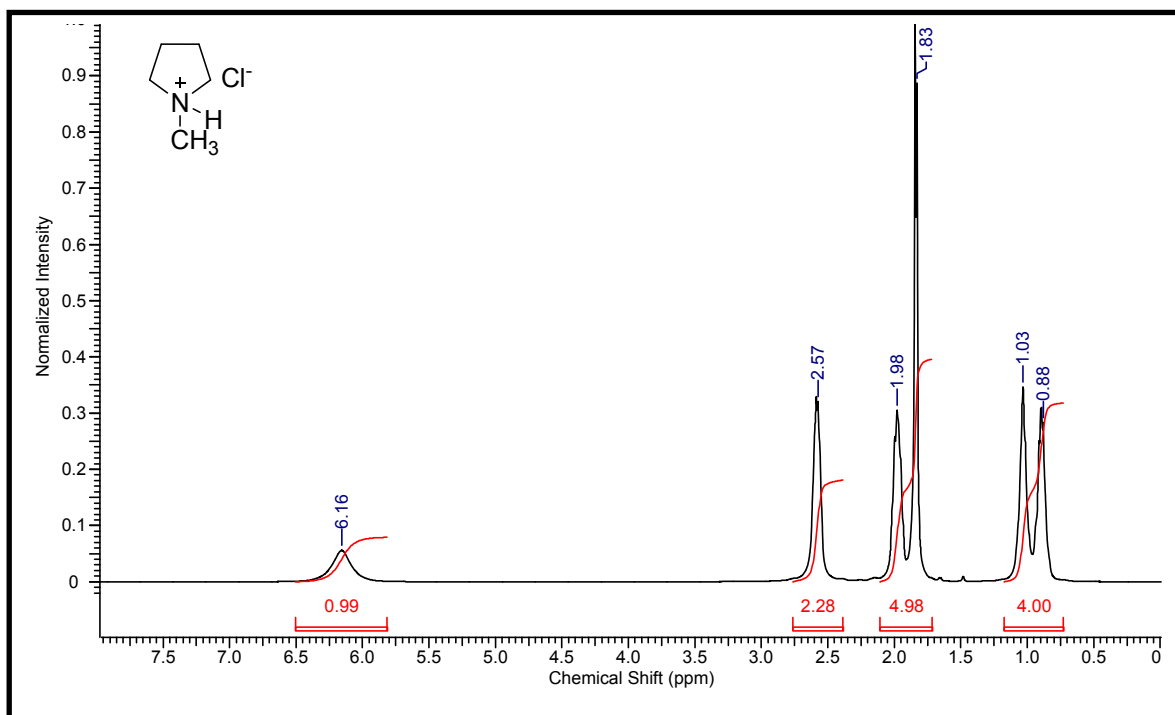

2. [Py]Cl -  $^1\text{H}$  NMR, 200 MHz,  $\text{CDCl}_3$

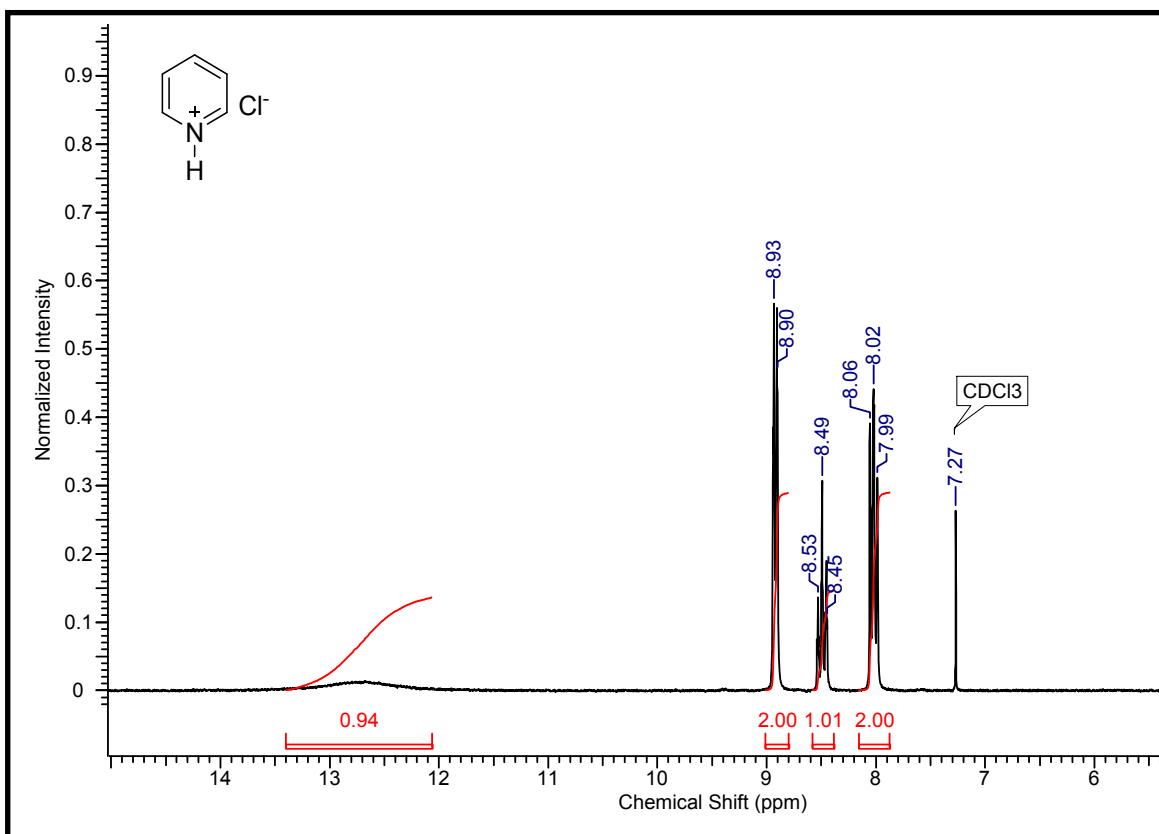

3. [MIM][BF<sub>4</sub>] - <sup>1</sup>H NMR, 400 MHz

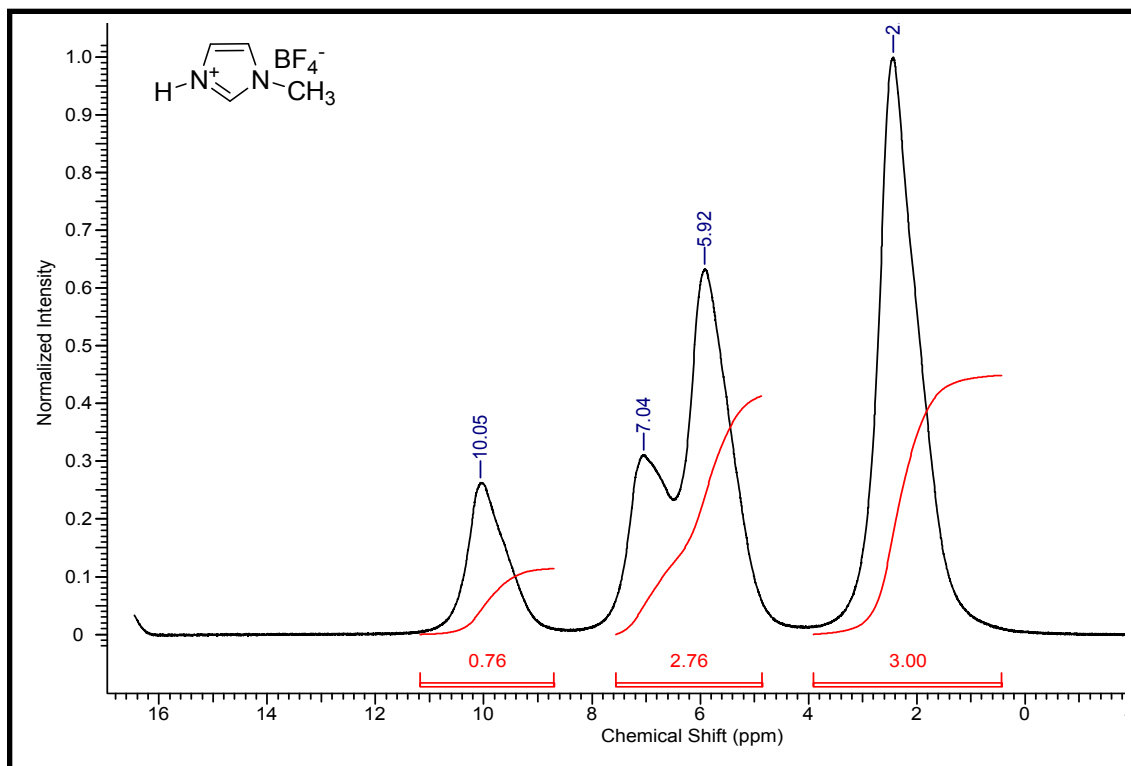

4. [MIM]Cl -  $^1\text{H}$  NMR, 200 MHz,  $\text{CDCl}_3$

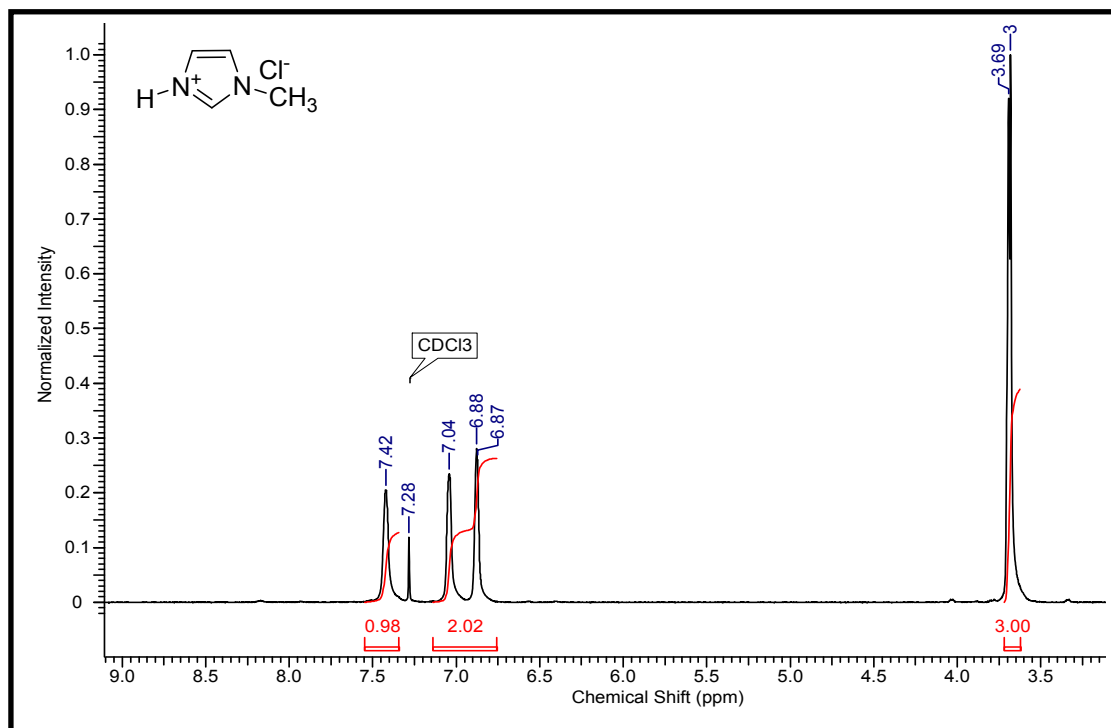

5. [EMIM][BF<sub>4</sub>] - <sup>1</sup>H NMR, 200 MHz, DMSO-d<sub>6</sub>

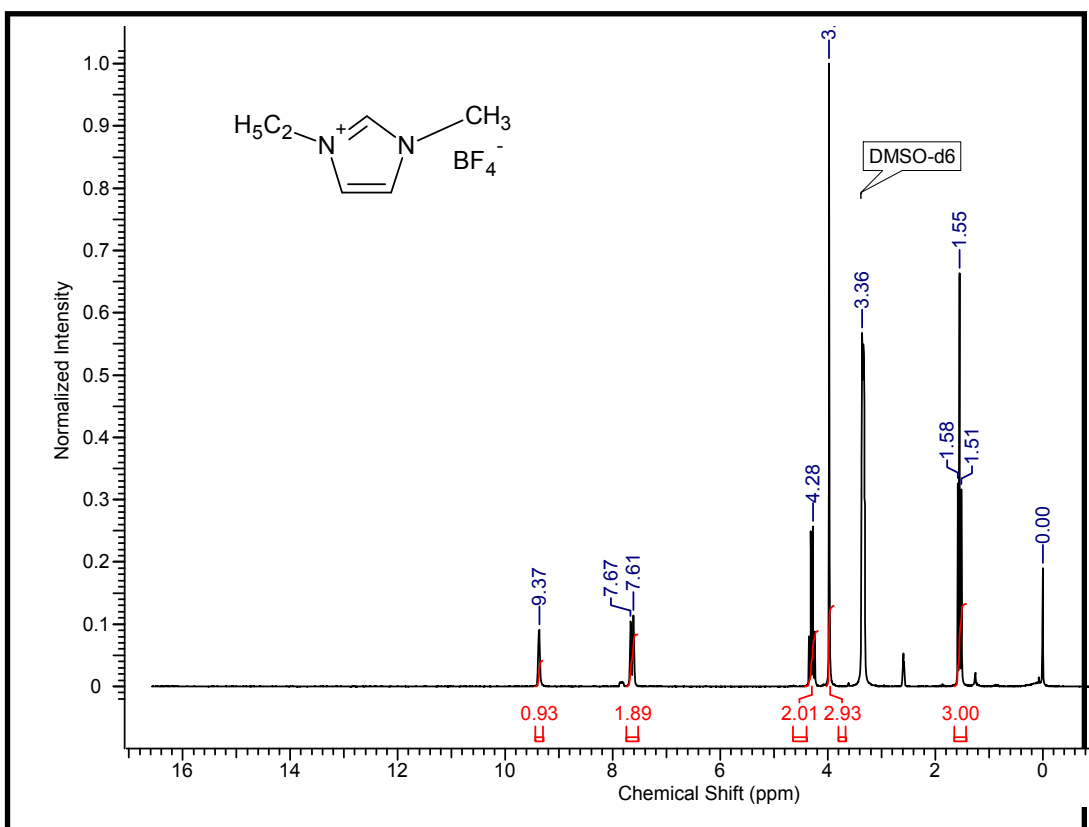



6. [BMIM][BF<sub>4</sub>] - <sup>1</sup>H NMR, 200 MHz, CDCl<sub>3</sub>

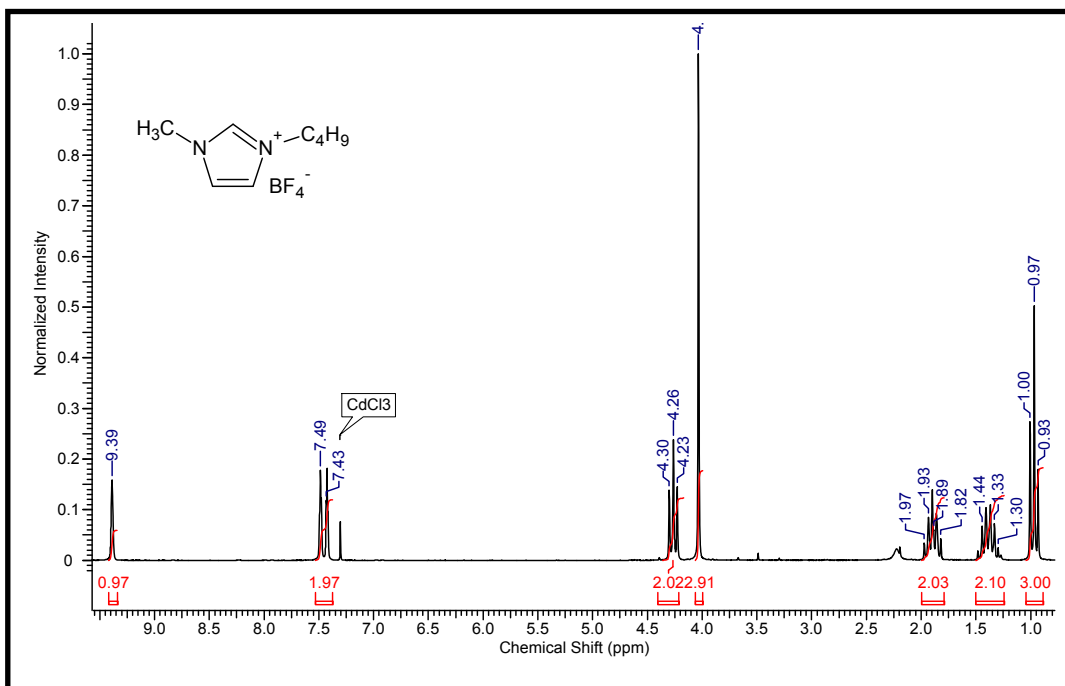

7. [HMIM][BF<sub>4</sub>] - <sup>1</sup>H NMR, 200 MHz, CDCl<sub>3</sub>

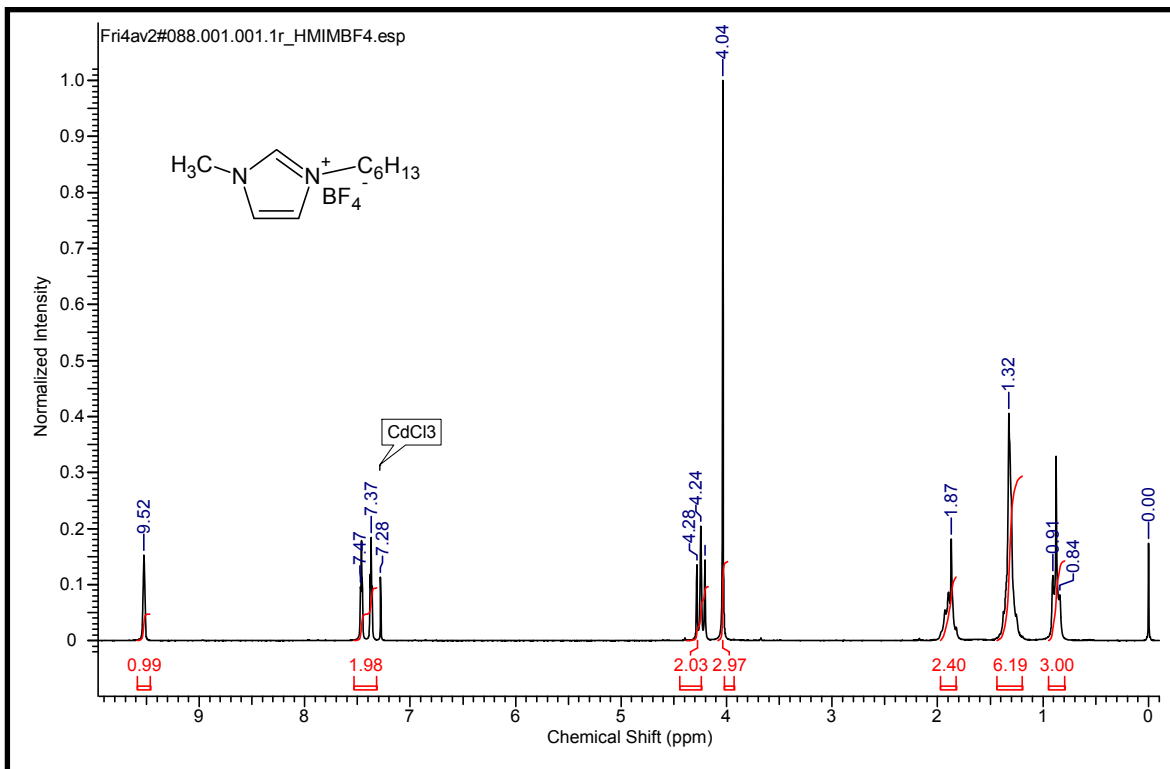

Supplement: c7cp07814e1.pdf [file c7cp07814e1.pdf]
